# Supplementary material for: A New Class of Selective ATM Inhibitors as Combination Partners of DNA Double-Strand Break Inducing Cancer Therapies
Source: Oxford University Press journal article supplement (doi:10.1158/1535-7163.mct-21-0934), 2022-04-11
Supplement: mct-21-0934-sfs3.docx [file mct-21-0934-sfs3.docx]

**Supplementary Figure S3**

**Figure S3. M4076 inhibits IR-induced pATM levels and ATM signaling.**

A549 cells were pre-treated with increasing concentrations of M4076 for 1h and exposed to IR (5 Gy). Whole cell lysates were collected 1 h post IR and p-ATM and its downstream targets p-KAP1, p-CHK2 and p-p53 were analyzed by Western blotting. pATM levels from images were quantified by GE Imager using ImageJ software and plotted as % of the IR-induced p-ATM (100%). Dotted line represents uninduced p-ATM levels.
