# Supplementary material for: A New Class of Selective ATM Inhibitors as Combination Partners of DNA Double-Strand Break Inducing Cancer Therapies
Source: Oxford University Press journal article supplement (doi:10.1158/1535-7163.mct-21-0934), 2022-04-11
Supplement: mct-21-0934-sfs4.docx [file mct-21-0934-sfs4.docx]

**Supplementary Figure S4**

**Figure S4. Body weight change of NCI-H1975 bearing CD1 nude mice upon 2 weeks of combined treatment of M4076 and IR (2 Gy fractions).**

Mice with established xenografts were irradiated with 2Gy fractions (5 days on, 2 days off) for 2 weeks. M4076 was given orally 10 min prior to IR at the indicated doses. Body weight was followed until day 46 post treatment.
