# Supplementary material for: A New Class of Selective ATM Inhibitors as Combination Partners of DNA Double-Strand Break Inducing Cancer Therapies
Source: Oxford University Press journal article supplement (doi:10.1158/1535-7163.mct-21-0934), 2022-04-11
Supplement: mct-21-0934-sfs5.docx [file mct-21-0934-sfs5.docx]

**Supplementary Figure S5**

**Figure S5. Body weight changes of FaDu bearing NMRI nude mice upon 6 weeks of combined treatment of M4076 and IR (2 Gy fractions).**

Mice were irradiated with 2Gy fractions (5 days on, 2 days off) for 6 weeks. M3541 was given orally 10 min prior to IR at the indicated doses and their body weight was followed for 125 days.
