# Supplementary material for: A New Class of Selective ATM Inhibitors as Combination Partners of DNA Double-Strand Break Inducing Cancer Therapies
Source: Oxford University Press journal article supplement (doi:10.1158/1535-7163.mct-21-0934), 2022-04-11
Supplement: mct-21-0934-sts2.docx [file mct-21-0934-sts2.docx]

**Supplementary Table S2**

**Table S2. In vitro selectivity of M3541 to ATM vs. off-target kinases.**

The only four kinases identified from in vitro protein kinase profiling as inhibited >50% at 1 µM concentration were selected and IC50 values were determined.
