# Supplementary material for: A New Class of Selective ATM Inhibitors as Combination Partners of DNA Double-Strand Break Inducing Cancer Therapies
Source: Oxford University Press journal article supplement (doi:10.1158/1535-7163.mct-21-0934), 2022-04-11
Supplement: mct-21-0934-sts5.docx [file mct-21-0934-sts5.docx]

**Supplementary Table S5**

**Table S5. M3541 enhances the antitumor effect of ionizing radiation in a large panel of cancer cell lines independently of their TP53 status (data table).**

Cell growth/viability of 79 cancer cell lines in response to M3541 alone or in combination with IR (3Gy) was quantified by sulforhodamine B (SRB) straining. Synergy score was calculated by the Bliss excess method as described in Material and Methods. *TP53 mutation status uncertain.
