# Supplementary material for: A New Class of Selective ATM Inhibitors as Combination Partners of DNA Double-Strand Break Inducing Cancer Therapies
Source: Oxford University Press journal article supplement (doi:10.1158/1535-7163.mct-21-0934), 2022-04-11
Supplement: mct-21-0934-sts7.docx [file mct-21-0934-sts7.docx]

**Supplementary Table S7**

**Table S7. Inhibition of radiation-induced ATM in tumor cell lines by M4076.**

The indicated cancer cell lines pretreated with increasing concentrations of inhibitor were irradiated with 2 Gy IR, lysed and subjected to Luminex immunoassays to quantify ATM phosphorylation (p-ATM Ser1981, total ATM) and CHK2 phosphorylation (p-CHK2 Thr 68, total CHK2). IC50 were determined by concentration-response analysis of normalized fluorescence intensities.
